# Supplementary material for: Sensitization of glioblastoma cells to TRAIL-induced apoptosis by IAP- and Bcl-2 antagonism
Source: PubMed Central journal article supplement (PMC6212537; doi:10.1038/s41419-018-1160-2), 2018-11-01

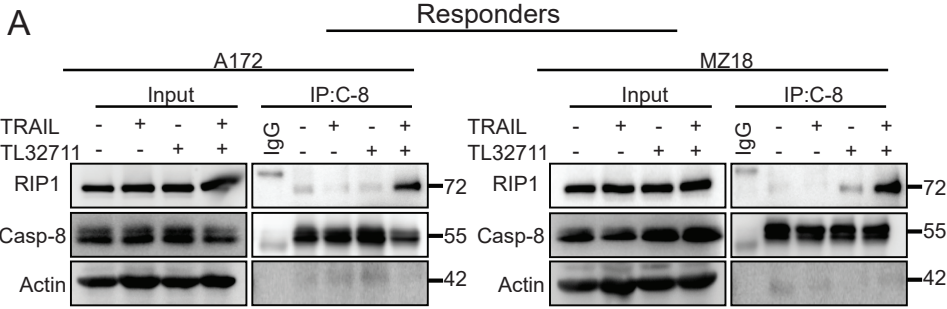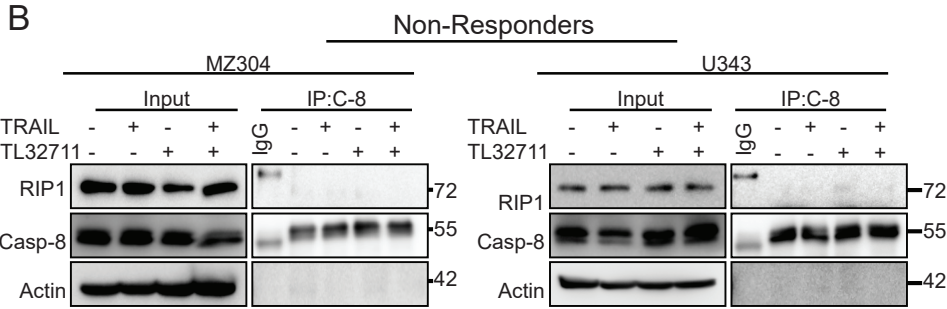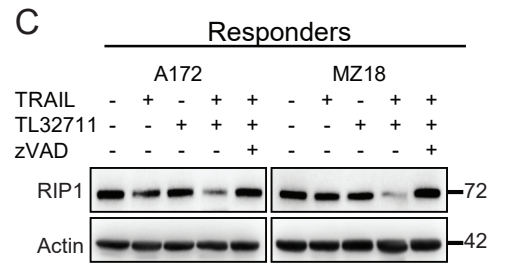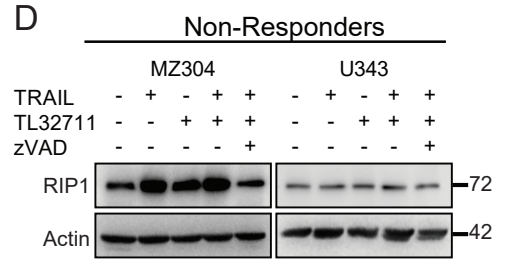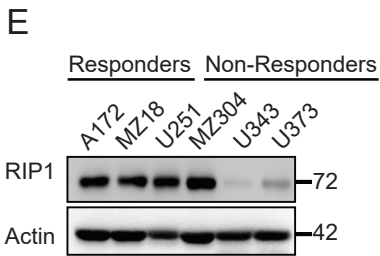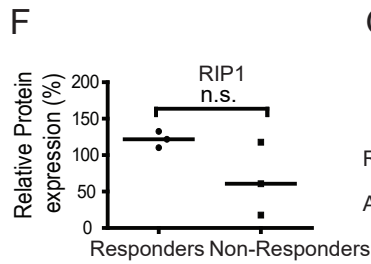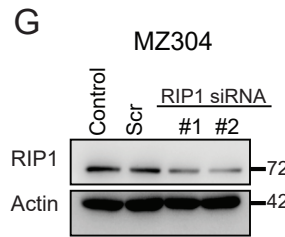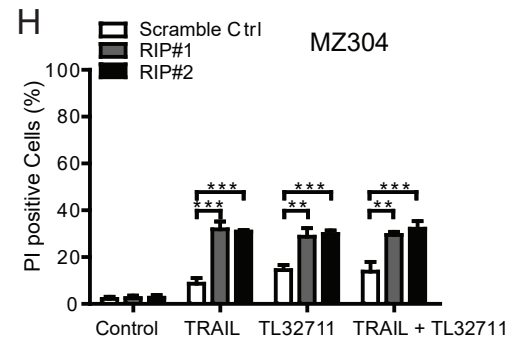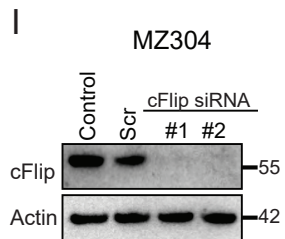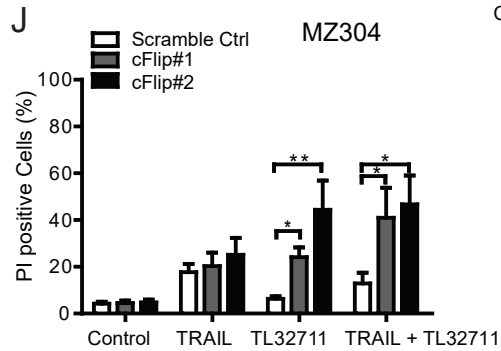

Supplement: 41419_2018_1160_MOESM4_ESM.pdf [file 41419_2018_1160_MOESM4_ESM.pdf]
